# Supplementary material for: Contrasting patterns of nucleotide diversity for four conifers of Alpine European forests
Source: PubMed Central journal article supplement (PMC3492901; doi:10.1111/j.1752-4571.2012.00256.x), 2012-11

*Abies alba*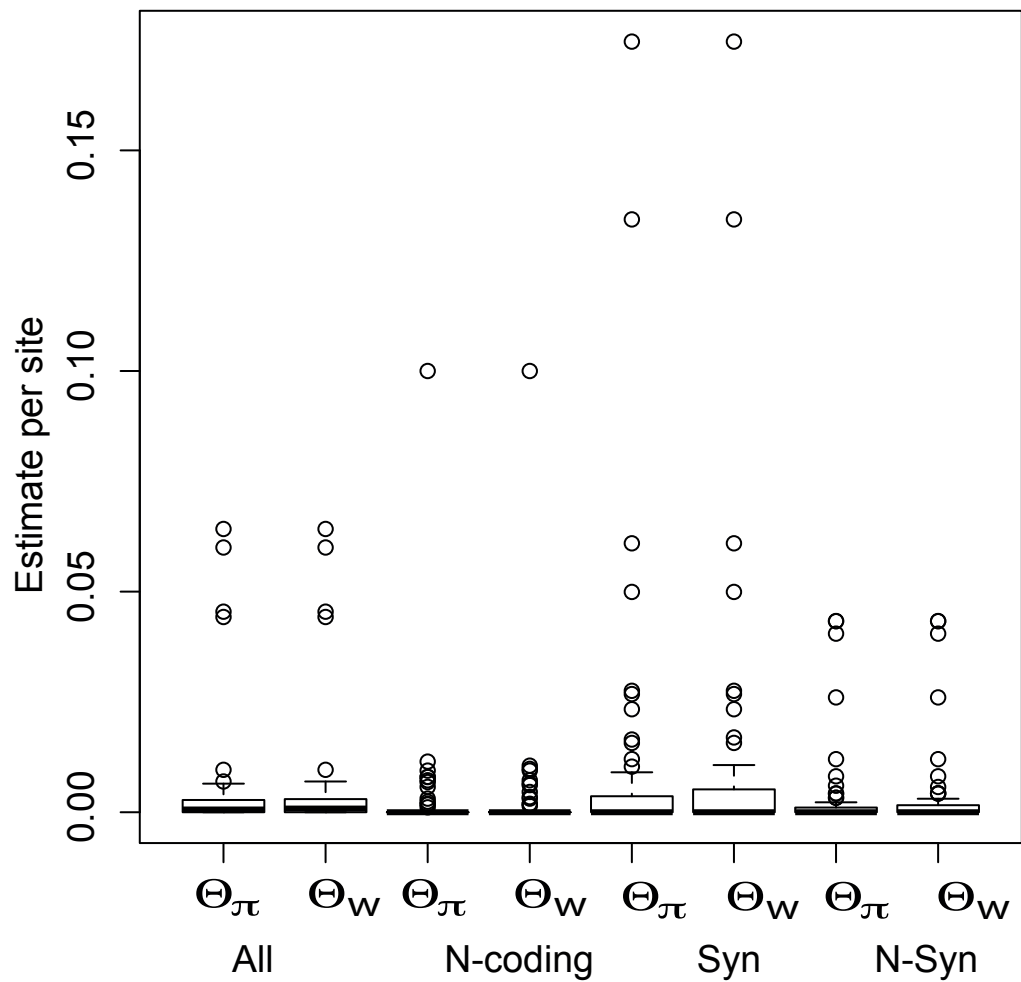*Larix decidua*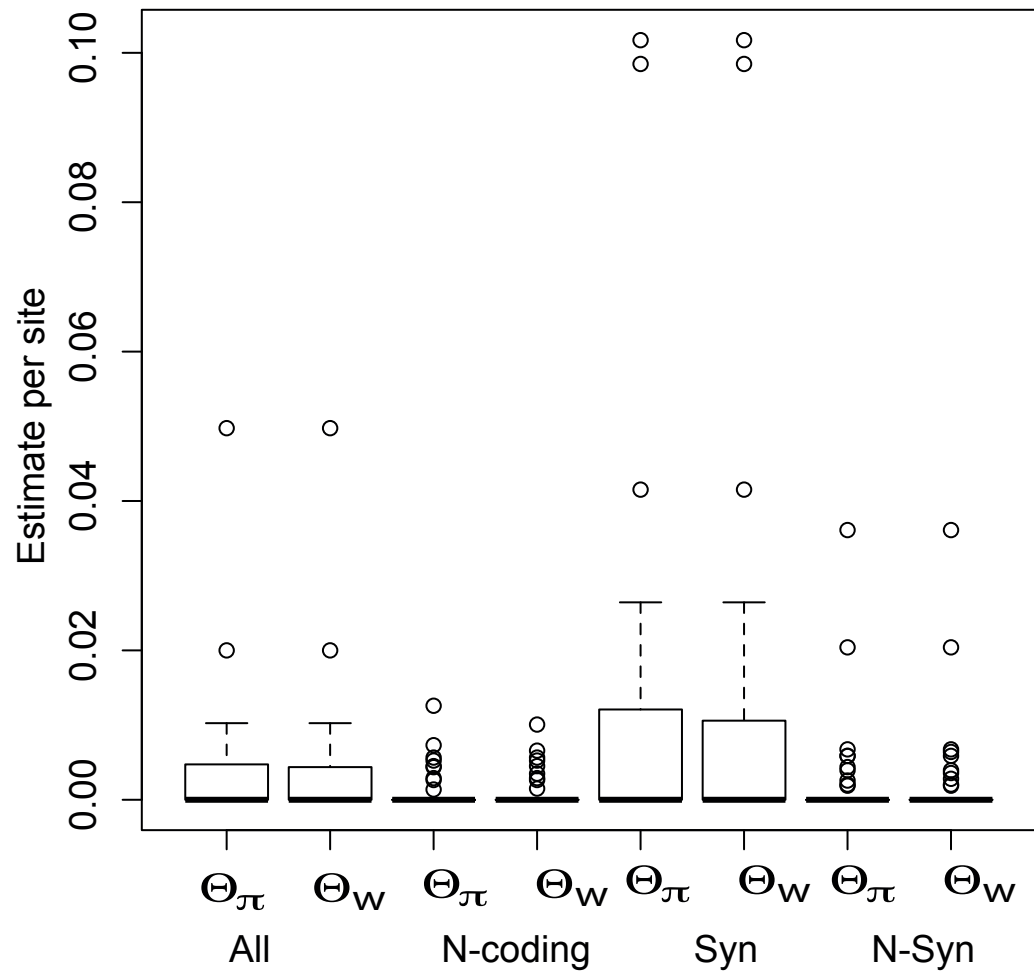*Pinus cembra*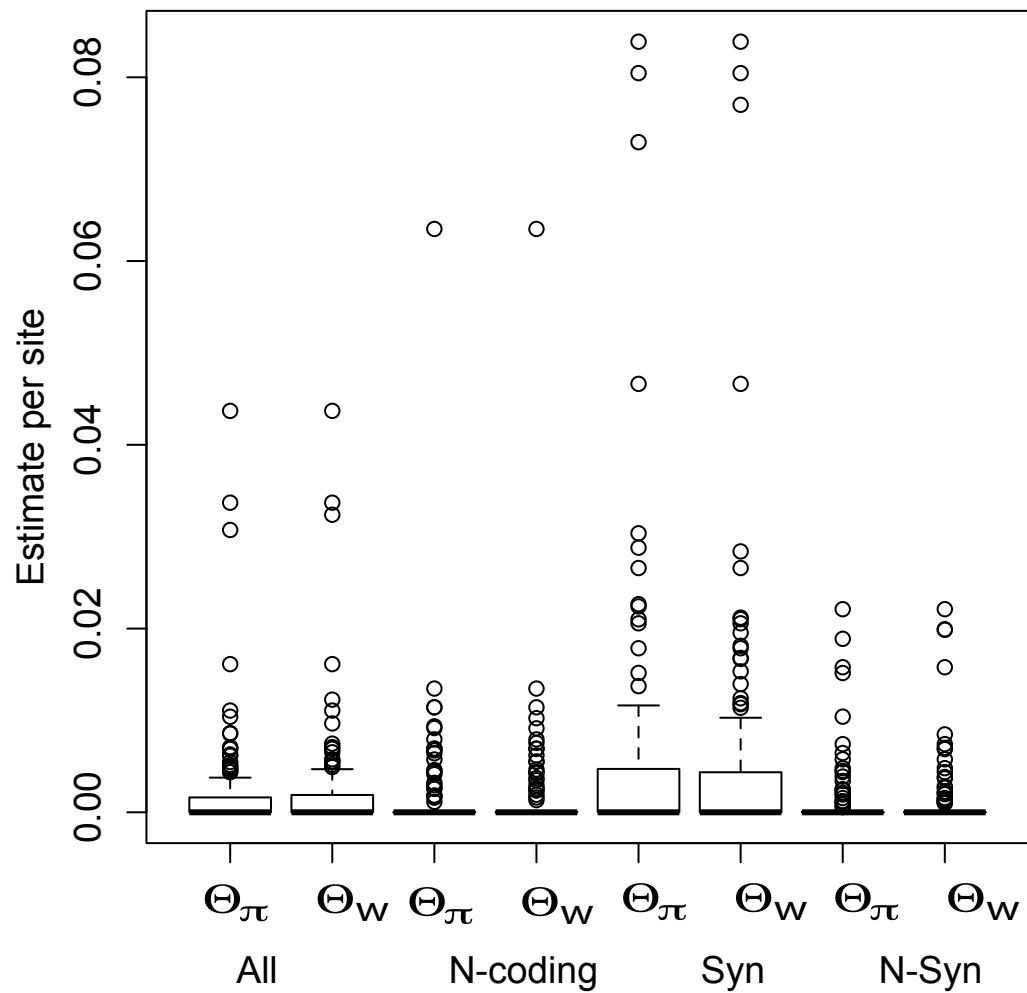*Pinus mugo*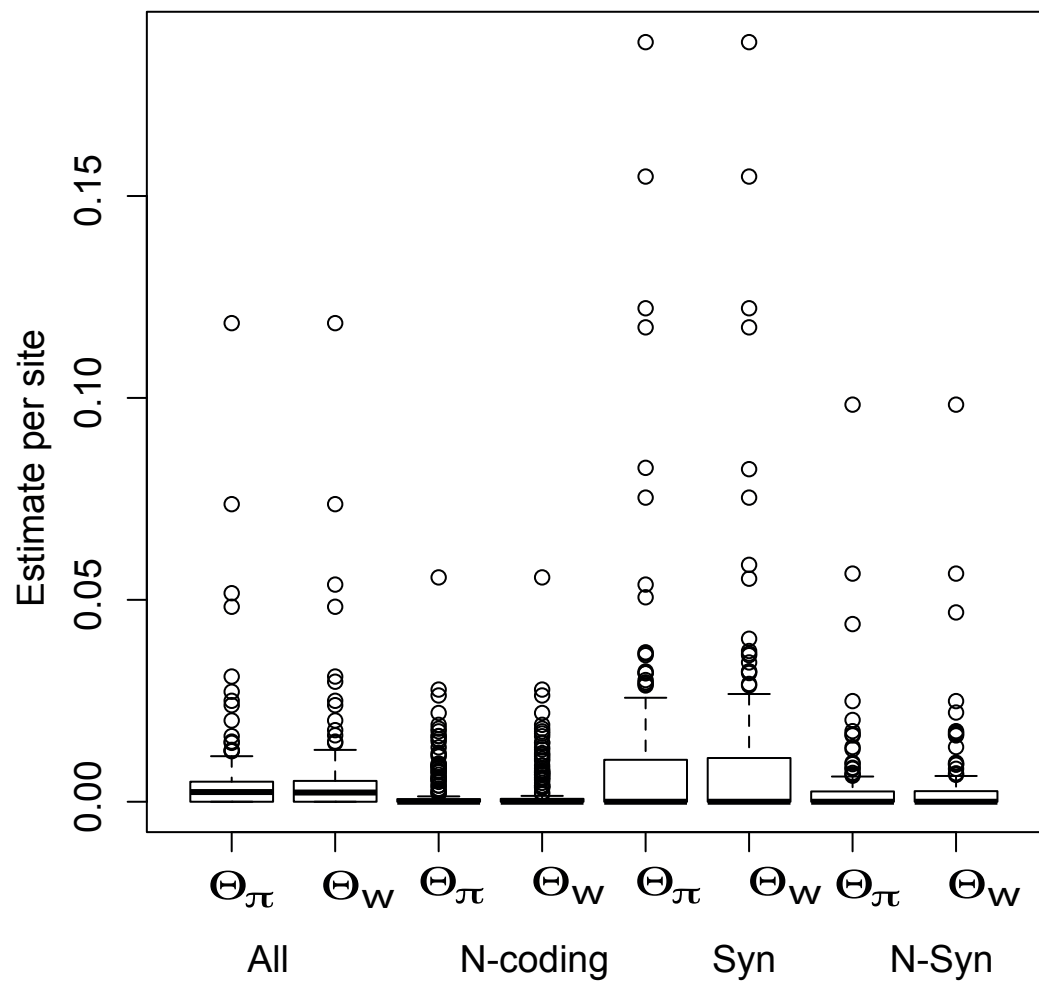

Supplement: eva0005-0762-SD3.pdf [file eva0005-0762-SD3.pdf]
