# Supplementary material for: Contrasting patterns of nucleotide diversity for four conifers of Alpine European forests
Source: PubMed Central journal article supplement (PMC3492901; doi:10.1111/j.1752-4571.2012.00256.x), 2012-11

*Abies alba*

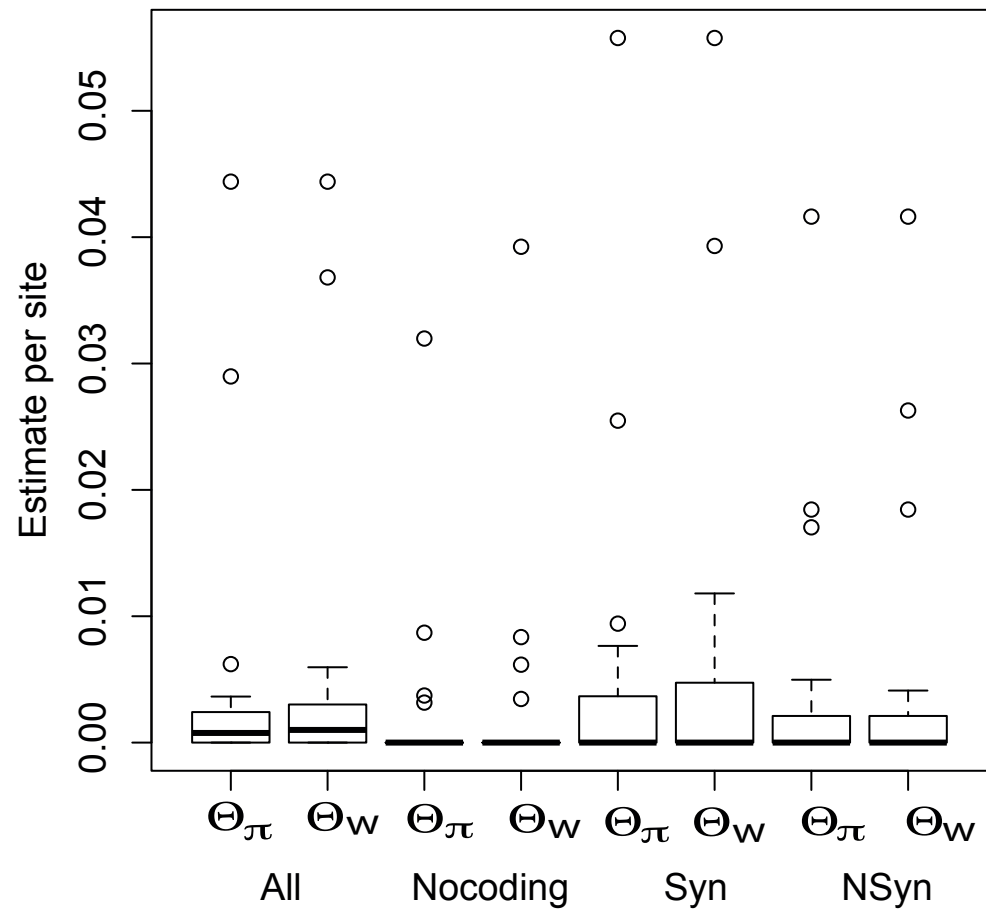

*Larix decidua*

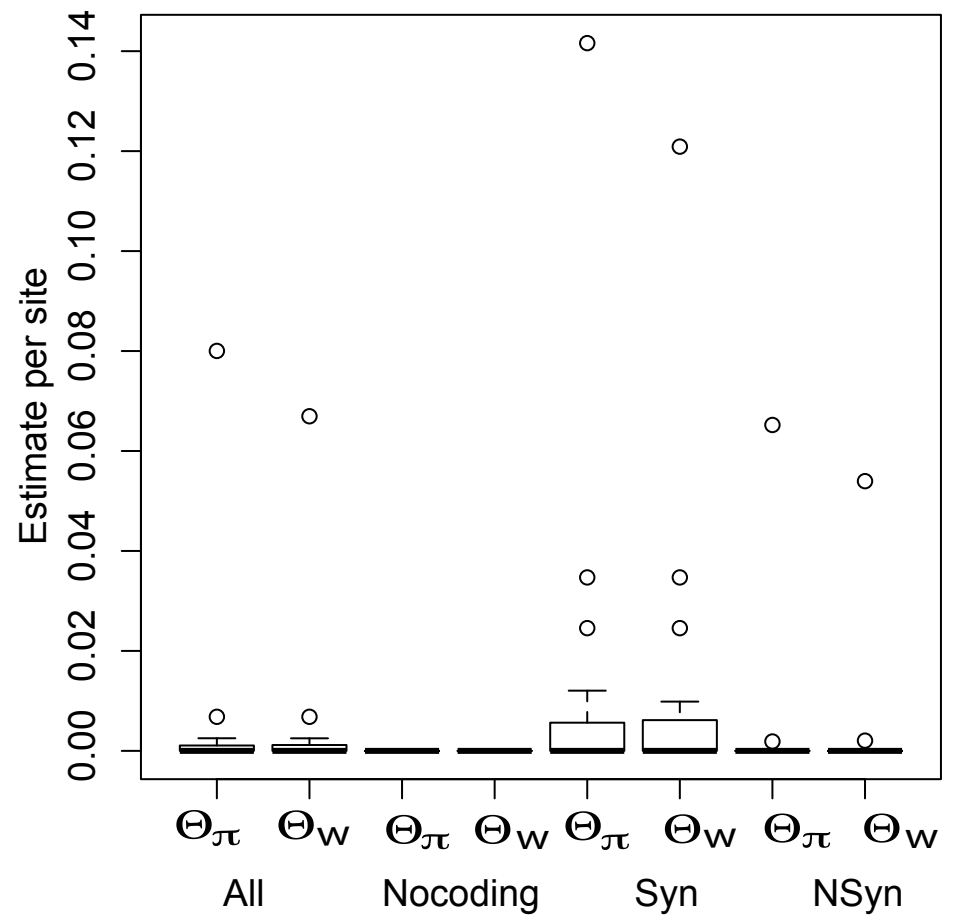

*Pinus cembra*

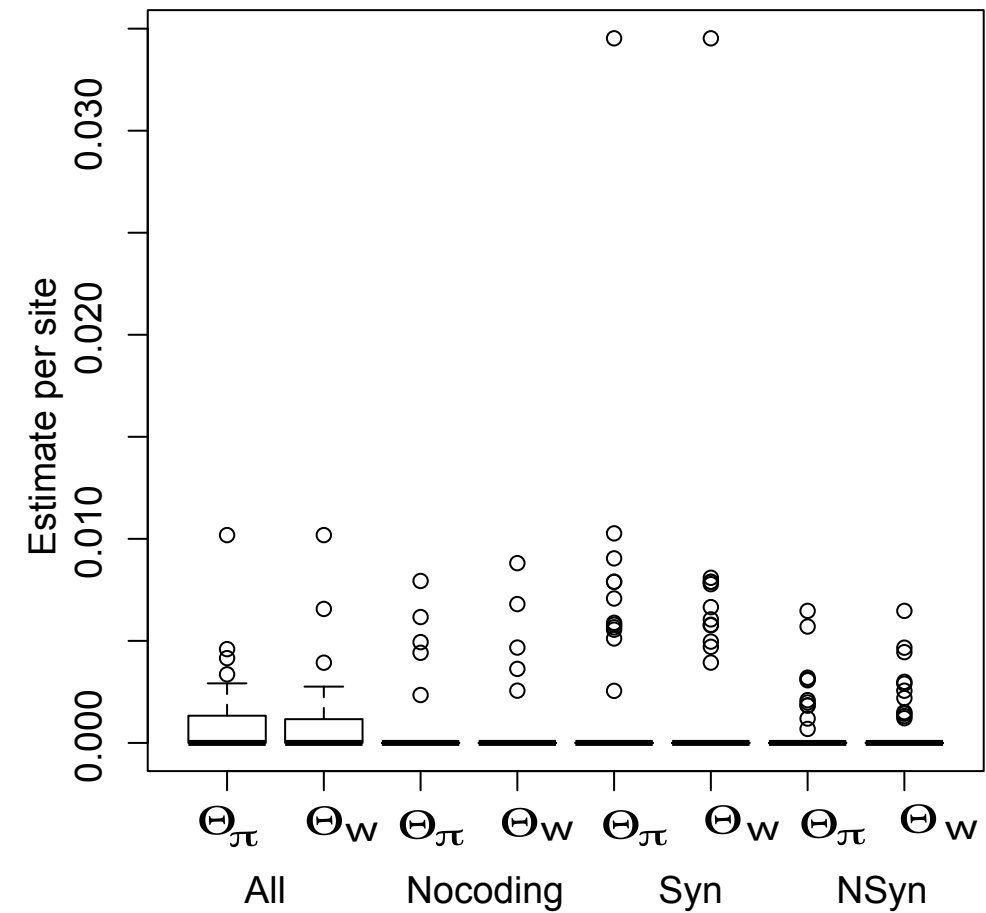

*Pinus mugo*

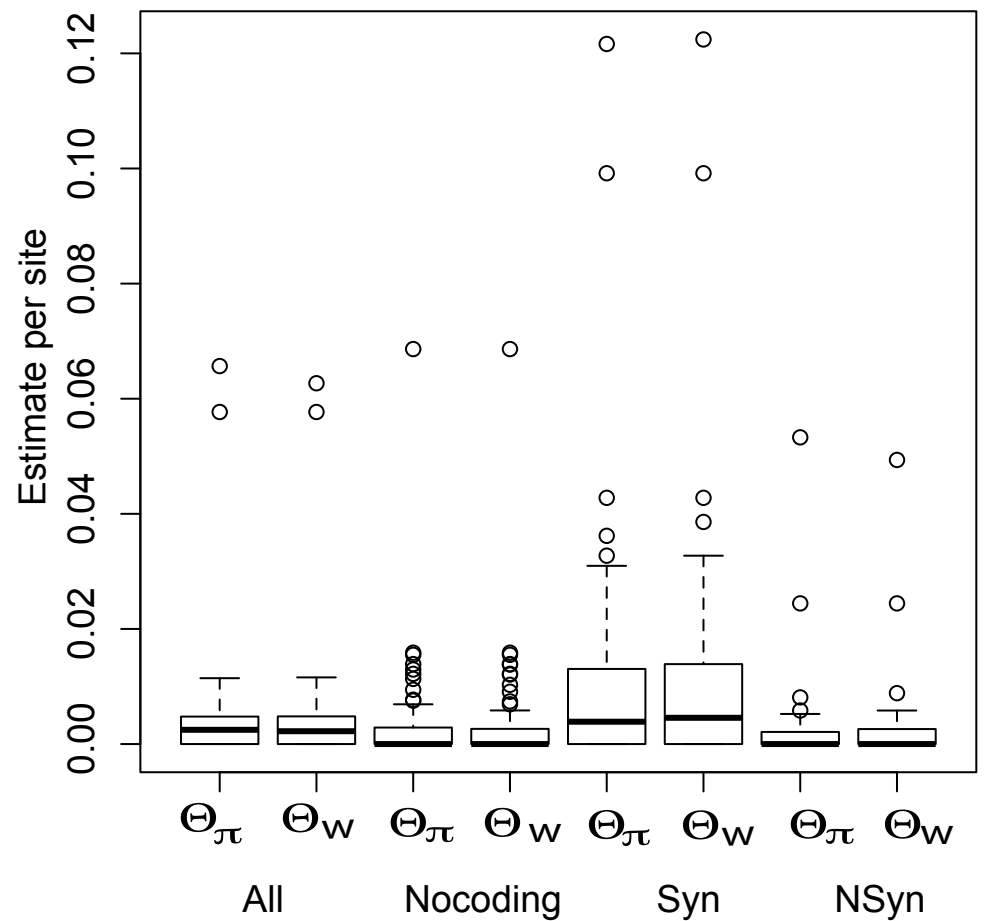

Supplement: eva0005-0762-SD4.pdf [file eva0005-0762-SD4.pdf]
